# Supplementary material for: Deciphering the inland salinity of a semi-arid area in North Karnataka
Source: Research Square preprint supplement (doi:10.21203/rs.3.rs-8617843/v1), 2026-02-02
Supplement: Supplementary file 1 [file 15ed5e593068bdb621d0e53b.xlsx]

## Sheet: Pre-Monsoon
Sl. No	Village	Date of Collection	Latitude	Latitude	Source	pH	TDS (mg/l)	EC (µS/cm at 25°C)	mg/l														Cl-/∑anions	Na+/Na+ + Cl-	HCO3-/SiO2	SiO2/(Na+ + K+ - Cl-)	(Na+ + K+ - Cl-) / (Na+ + K+ - Cl- + Ca2+)
									Ca	Mg	Na	K	HCO3	CO3	Cl	SO4	NO3	Br	PO4	F	SiO2
1	Bhognur	2023-06-01	15.6028	75.4613	Mk. II Hand-Pump	8.01	208	390	20	11	38	2.84	171	0	21.27	9.78	1.02	0.19	0	0	35		0.165477	0.733591	2.40601	1.03584	0.529368
2	Shirkol	2023-05-29	15.6081	75.2136	Dug well	7.23	1760	3030	76	45	535	2.4	567	0	553.02	160.07	43.02	3.7	0	1.94	14		0.536601	0.598568	19.9446	0.0603514	0.670202
3	Gummagol	2023-05-29	15.592	75.152	Dug well	6.89	6036	11000	596	356	1214	8.74	67	0	3002.62	817.25	0.36	15.89	0	0.49	17		0.821894	0.383922	1.94087	-0.0178556	16.735
4	Morab	2023-05-29	15.5834	75.1588	Dug well	7.36	2450	4280	306	129	372	2.74	268	0	1031.6	240.75	204.51	6.28	0	0.27	34		0.6945	0.357246	3.88174	-0.088039	-5.26006
5	Tale Morab	2023-05-30	15.5562	75.1492	Dug well	7.61	165	320	12	9	37	2.09	110	0	24.82	10.46	2.11	0.21	0.04	0.35	15		0.252047	0.696798	3.61137	0.518942	0.61593
6	Naikanur	2023-06-01	15.6051	75.4675	Dug well	7.68	285	535	30	12	48	2.89	262	0	21.27	9.71	1.02	0.21	0	0.41	3		0.116773	0.776699	43.0081	0.0639851	0.509929
7	Shanwad	2023-05-29	15.599	75.3135	Shallow Bore well	7.01	2054	3740	256	105	342	2.07	305	0	946.52	164.27	52.24	5.56	0	0.32	30		0.740611	0.357703	5.00667	-0.0847948	-11.518
8	Halakusugal	2023-05-29	15.5872	75.2954	Shallow Bore well	7.17	194	360	24	7	35	2.89	159	0	17.73	8.58	1.68	0.17	0	0.63	14		0.149356	0.752688	5.59293	0.425313	0.477299
9	Tirlapur	2023-05-29	15.5535	75.2182	Shallow Bore well	6.9	247	440	24	11	51	3.62	183	0	31.91	11.4	2.77	0.23	0	0.51	11		0.213682	0.711297	8.19273	0.259688	0.540242
10	Hanasi	2023-05-29	15.6135	75.2131	Shallow Bore well	7.44	201	380	24	9	34	3.22	153	0	24.82	11.07	1.98	0.2	0	0.42	15		0.200252	0.678643	5.02308	0.580229	0.41764
11	Ayetti	2023-05-30	15.6026	75.1074	Shallow Bore well	7.79	179	340	14	8	37	1.97	134	0	24.82	10.42	0.77	0.19	0	0.31	15		0.222579	0.696798	4.3993	0.52064	0.578079
12	Shirur	2023-05-30	15.6087	75.1045	Shallow Bore well	7.37	350	620	30	15	72	2.93	140	0	95.72	37.91	10.76	0.6	0	0.31	49		0.451345	0.536913	1.40703	3.22757	0.252013
13	Ballur	2023-05-30	15.6101	75.2401	Shallow Bore well	7.38	207	360	28	10	27	5.58	171	0	21.27	8.66	2.06	0.19	0.04	0.38	12		0.164816	0.661765	7.01754	0.557515	0.338535
14	Gobbargumpi	2023-05-30	15.6021	75.3374	Shallow Bore well	7.62	3275	5380	312	115	546	151.65	561	0	1020.96	606.55	180.38	7.29	0	0.31	29		0.536812	0.451837	9.52653	-0.816493	-0.082007
15	Alagawadi	2023-05-30	15.6304	75.2885	Shallow Bore well	7.94	258	435	14	7	70	2.21	226	0	17.73	7.77	1.6	0.18	0	1	37		0.112424	0.858896	3.00799	0.473716	0.787883
16	Kumarkoppa	2023-05-31	15.5399	75.3341	Shallow Bore well	7.44	3198	5580	314	190	575	3.49	287	0	1212.39	439	289.01	8.74	0	1	46		0.646823	0.422297	3.07252	-0.168075	-1.38267
17	Amargol	2023-05-31	15.6652	75.3771	Shallow Bore well	7.73	3650	6120	234	150	834	19.51	634	0	903.98	688.07	433.5	3.15	0	0.44	34		0.445163	0.587117	9.18291	0.100517	0.490418
18	Nagnur	2023-05-31	15.6181	75.3998	Shallow Bore well	8.16	721	1280	32	16	215	0.63	427	0	81.54	70.3	44.72	1.11	0	1.25	40		0.198864	0.802538	5.257	0.188503	0.815325
19	Arahatti	2023-05-31	15.6618	75.4366	Shallow Bore well	7.34	3253	5950	432	231	442	4.27	293	0	1538.53	205.5	221.19	10.63	0	0.52	28		0.772074	0.306902	5.15323	-0.0387185	9.73247
20	Tadhal	2023-05-31	15.6595	75.4469	Shallow Bore well	7.77	2886	5340	380	161	473	5.59	451	0	1024.51	541.2	25.26	8.24	0	0.97	39		0.600455	0.415751	5.69485	-0.158485	-0.757912
22	Khannur	2023-06-01	15.5866	75.4613	Shallow Bore well	7.71	3091	5420	196	80	850	2.66	519	0	946.52	627.72	71.48	5.77	0	2.92	13		0.537608	0.580561	19.6605	0.0419149	0.513035

## Sheet: Post-Monsoon
Sl. No	Village	Date of Collection	Latitude	Latitude	Source	pH	TDS (mg/l)	EC (µS/cm at 25°C)	mg/l														Cl-/∑anions	Na+/Na+ + Cl-	HCO3-/SiO2	SiO2/(Na+ + K+ - Cl-)	(Na+ + K+ - Cl-) / (Na+ + K+ - Cl- + Ca2+)
									Ca	Mg	Na	K	HCO3	CO3	Cl	SO4	NO3	Br	PO4	F	SiO2
1	Bhognur	2023-11-30	15.6028	75.4613	Mk. II Hand-Pump	7.85	2825	5240	222	181	593	1.29668	183	0	1195	447	74	4.08	0	1.55	27		0.711949	0.433379	3.33778	-0.113863	-2.46191
2	Shirkol	2023-12-01	15.6081	75.2136	Dug well	8.15	1061	1750	34	25	304	9.52657	586	0	113	167	50	0.87	0	1.077	42		0.185894	0.805694	6.87098	0.136092	0.858019
3	Gummagol	2023-12-01	15.592	75.152	Dug well	7.55	4485	7920	468	196	892	1.59591	299	0	1556	1005	183	10.868	0	2.328	30		0.601749	0.469095	4.90817	-0.197	-0.276553
4	Morab	2023-12-01	15.5834	75.1588	Dug well	7.51	4956	8240	324	236	983	124.777	409	0	1393	758	887	11.139	0	2.45	21		0.514557	0.520993	9.59123	0.105351	0.290581
5	Tale Morab	2023-12-01	15.5562	75.1492	Dug well	8.27	294	575	36	13	64	0.702199	195	30	28	19	5	0.292	0	0.942	24		0.143184	0.778907	4.00123	0.397337	0.527649
6	Naikanur	2023-11-30	15.6051	75.4675	Dug well	8.15	1237	2130	60	59	295	10.2737	360	0	337	246	10	1.21	0	0.92	11		0.457964	0.574326	16.1168	0.102213	0.544246
7	Shanwad	2023-12-01	15.599	75.3135	Shallow Bore well	7.37	2484	4500	298	136	412	2.39386	256	0	1007	262	211	7.063	0	1.779	33		0.682079	0.38673	3.82029	-0.105305	-2.33478
8	Halakusugal	2023-12-01	15.5872	75.2954	Shallow Bore well	7.71	506	920	54	23	100	2.27716	159	0	170	54	6	0.944	0	0.587	17		0.553334	0.47552	4.60594	-1.45321	-0.168538
9	Tirlapur	2023-12-01	15.5535	75.2182	Shallow Bore well	7.73	1147	1875	56	43	281	3.9	531	0	110	259	70	1.531	0	1.125	26		0.168537	0.797461	10.0575	0.0939327	0.766942
10	Hanasi	2023-12-01	15.6135	75.2131	Shallow Bore well	7.77	955	1660	58	32	250	2.29412	305	0	273	118	36	2.022	0	0.916	20		0.486989	0.585312	7.51	0.206299	0.526705
11	Ayetti	2023-12-01	15.6026	75.1074	Shallow Bore well	7.38	2926	5265	368	135	515	0.60844	354	0	971	521	199	7.276	0	2.178	22		0.577089	0.449787	7.92411	-0.146947	-0.371479
12	Shirur	2023-12-01	15.6087	75.1045	Shallow Bore well	7.74	1381	2300	86	55	322	1.89514	384	0	273	185	224	3.01	0	2.325	48		0.356145	0.645132	3.93967	0.251733	0.596149
13	Ballur	2023-12-01	15.6101	75.2401	Shallow Bore well	7.61	1936	3365	148	70	460	0.323171	317	0	691	278	95	4.429	0	0.813	33		0.607025	0.506429	4.73059	2.12885	0.0651871
14	Gobbargumpi	2023-12-01	15.6021	75.3374	Shallow Bore well	7.51	2030	3640	246	104	342	0.177545	256	0	954	173	55	5.584	0	0.836	35		0.753539	0.355895	3.60199	-0.096794	-45.7745
15	Alagawadi	2023-12-01	15.6304	75.2885	Shallow Bore well	7.94	2589	4570	110	85	750	1.09719	500	0	982	266	90	6.7	0	1.7	37		0.643247	0.540688	6.65485	0.249544	0.472967
16	Kumarkoppa	2023-11-29	15.5399	75.3341	Shallow Bore well	7.86	2838	4900	116	102	785	1.49616	573	0	900	512	72	5.8	0	2.3	41		0.542442	0.573444	6.88242	0.155435	0.602217
17	Amargol	2023-11-30	15.6652	75.3771	Shallow Bore well	7.5	7600	13660	612	435	1592	1.7954	262	0	3938	807	54	19.249	0	3.009	22		0.83233	0.383894	5.86474	-0.017511	3.72661
18	Nagnur	2023-11-29	15.6181	75.3998	Shallow Bore well	7.92	2059	3600	58	56	636	0.542609	561	0	720	193	54	4.346	0	2.161	40		0.587564	0.576538	6.90674	0.181023	0.717232
19	Arahatti	2023-11-29	15.6618	75.4366	Shallow Bore well	7.87	1833	3310	164	101	365	1.09719	268	0	769	245	24	5.239	0	1.262	29		0.684108	0.422489	4.551	-0.166591	-2.40942
20	Tadhal	2023-11-29	15.6595	75.4469	Shallow Bore well	7.17	3213	5670	426	152	499	18.6272	311	0	1141	713	73	8.756	0	1.573	33		0.601515	0.402652	4.64105	-0.109699	-0.887315
22	Khannur	2023-11-30	15.5866	75.4613	Shallow Bore well	7.85	2527	4560	204	163	492	1.19693	256	0	961	446	104	3.1	0	1.71	26		0.639305	0.441059	4.84883	-0.1522	-1.25998
