# Supplementary material for: Deciphering the inland salinity of a semi-arid area in North Karnataka
Source: Research Square preprint supplement (doi:10.21203/rs.3.rs-8617843/v1), 2026-02-02
Supplement: Supplementary file 2 [file a0fea9664170fde6f848946a.xlsx]

## Sheet: Sheet1
Sl.No.	Sample No.	Longitude	Latitude	wt%										Toposheet		Chemical Index of Alteration		Plagioclase Index of Alteration		Index of Compostional Variation		K2O/Al2O3 ratio
				SiO2	Al2O3	Fe2O3	TiO2	CaO	MgO	MnO	Na2O	K2O	P2O5
1	48M6/001/S/18-19	75.2593	15.509	54.275	10.992	5.559	0.807	7.155	3.356	0.15	0.309	0.885	0.096	48M06		43.1606		44.8475		22.5787		0.0871504
2	48M6/002/S/18-19	75.278	15.509	56.707	10.503	5.218	0.831	6.737	3.233	0.15	0.343	0.802	0.095	48M06		43.4282		45.0451		20.8351		0.082654
3	48M6/003/S/18-19	75.2966	15.509	57.287	11.213	5.793	0.874	4.967	3.252	0.105	0.239	0.995	0.114	48M06		51.6387		54.3337		18.5641		0.0960515
4	48M6/004/S/18-19	75.3153	15.509	57.155	11.627	6.19	0.91	4.434	3.291	0.098	0.208	1.152	0.119	48M06		54.6429		58.0445		17.8934		0.107248
5	48M6/005/S/18-19	75.3339	15.509	57.81	11.249	5.483	0.837	6.607	3.085	0.135	0.228	1.081	0.156	48M06		45.3457		47.5905		20.8554		0.104019
6	48M6/006/S/18-19	75.3525	15.509	56.457	12.062	6.215	0.911	4.237	3.208	0.116	0.264	0.761	0.054	48M06		57.3729		59.7125		17.247		0.0682917
7	48M6/007/S/18-19	75.3712	15.509	56.628	11.874	6.159	0.903	4.27	3.09	0.115	0.238	0.733	0.065	48M06		57.0241		59.283		17.1739		0.0668205
8	48M6/008/S/18-19	75.3898	15.509	58.688	11.751	6.066	0.922	4.187	2.991	0.13	0.239	0.669	0.045	48M06		57.3745		59.4774		16.4902		0.0616246
9	48M6/015/S/18-19	75.2593	15.5271	55.932	10.762	5.569	0.819	6.091	3.225	0.133	0.288	0.819	0.106	48M06		46.3937		48.2372		20.6886		0.0823747
10	48M6/016/S/18-19	75.278	15.5271	57.167	10.831	5.518	0.842	5.9	3.213	0.136	0.369	0.726	0.089	48M06		47.191		48.8641		19.8385		0.0725556
11	48M6/017/S/18-19	75.2966	15.5271	56.564	11.122	5.6	0.871	5.563	3.209	0.13	0.362	0.779	0.087	48M06		49.0485		50.9429		18.9598		0.0758154
12	48M6/018/S/18-19	75.3153	15.5271	59.639	11.462	5.99	0.9	4.107	3.045	0.116	0.217	0.786	0.065	48M06		56.9195		59.4304		16.8456		0.0742275
13	48M6/019/S/18-19	75.3339	15.5271	55.851	12.052	6.429	0.876	4.867	3.136	0.116	0.156	0.885	0.077	48M06		54.4948		56.9621		18.7957		0.0794853
14	48M6/020/S/18-19	75.3525	15.5271	55.656	12.158	6.463	0.909	4.584	3.151	0.144	0.175	0.751	0.061	48M06		56.3039		58.5064		17.7965		0.0668622
15	48M6/021/S/18-19	75.3712	15.5271	51.74	14.37	7.53	1.06	3.74	3.14	0.12	0.19	0.9	0.06	48M06		63.9892		66.891		15.7358		0.0677936
16	48M6/022/S/18-19	75.3898	15.5271	60.65	10.41	7.05	1.03	5.11	2.74	0.12	0.35	0.72	0.07	48M06		49.439		51.3392		16.6214		0.074866
17	48M6/029/S/18-19	75.2593	15.5452	56.44	12.85	6.37	1.01	4.98	3.03	0.14	0.31	0.85	0.1	48M06		55.0679		57.3284		16.5248		0.0716009
18	48M6/030/S/18-19	75.278	15.5452	52.59	12.36	6.58	0.95	5.94	3.12	0.15	0.38	0.91	0.11	48M06		49.8983		51.9647		18.9789		0.079694
19	48M6/031/S/18-19	75.2966	15.5452	55.49	11.8	5.87	0.92	5.62	3.14	0.13	0.44	0.87	0.13	48M06		49.8227		51.8858		18.4674		0.0798068
20	48M6/032/S/18-19	75.3153	15.5452	60.53	9.45	6.03	0.98	5.28	2.48	0.13	0.4	0.8	0.11	48M06		45.9313		47.9494		16.4286		0.0916349
21	48M6/033/S/18-19	75.3339	15.5452	53.95	13.69	7.19	1	4.29	3.19	0.12	0.26	0.96	0.11	48M06		59.6331		62.4603		17.01		0.075905
22	48M6/034/S/18-19	75.3525	15.5452	52.4	13.4	7.08	0.98	4.12	3.05	0.14	0.26	0.83	0.08	48M06		60.3135		62.8553		16.7959		0.0670465
23	48M6/035/S/18-19	75.3712	15.5452	52.4	13.04	6.62	0.93	4.62	2.94	0.12	0.2	0.82	0.08	48M06		57.5544		59.9011		17.4731		0.0680674
24	48M6/036/S/18-19	75.3898	15.5452	58.84	9.51	6.14	0.98	6.79	2.58	0.13	0.37	0.73	0.09	48M06		40.8951		42.3336		18.0816		0.0830893
25	48M6/043/S/18-19	75.2593	15.5633	51.14	12.45	6.53	0.9	6.93	3.31	0.15	0.32	0.89	0.15	48M06		46.9102		48.6771		21.1444		0.0773791
26	48M6/044/S/18-19	75.278	15.5633	53.04	12.09	6.05	0.87	7.33	3.24	0.16	0.35	0.81	0.15	48M06		44.9942		46.5119		21.6207		0.0725206
27	48M6/045/S/18-19	75.2966	15.5633	58.26	9.35	5.54	0.95	6.92	2.63	0.12	0.36	0.83	0.12	48M06		39.9184		41.5106		18.2632		0.096088
28	48M6/046/S/18-19	75.3153	15.5633	55.91	12.06	6.34	0.93	5.53	3.18	0.13	0.38	0.96	0.14	48M06		50.7169		53.0345		18.7634		0.0861642
29	48M6/047/S/18-19	75.3339	15.5633	59.91	9.78	6.66	0.93	3.38	2.44	0.11	0.27	0.91	0.07	48M06		56.3533		59.7443		15.8065		0.100718
30	48M6/048/S/18-19	75.3525	15.5633	60.08	9.77	6.43	0.97	3.84	2.35	0.12	0.32	0.86	0.08	48M06		53.6539		56.5446		15.3505		0.0952811
31	48M6/049/S/18-19	75.3712	15.5633	58.93	10.24	6.78	0.96	3.78	2.37	0.1	0.26	0.8	0.07	48M06		55.6323		58.3788		15.6771		0.0845654
32	48M6/050/S/18-19	75.3898	15.5633	58	10.12	7.18	0.97	3.4	2.51	0.13	0.26	0.75	0.07	48M06		57.6917		60.4913		15.6701		0.0802202
33	48M6/051/S/18-19	75.4085	15.5633	59.23	10.11	7.22	0.99	3.66	2.61	0.13	0.33	0.76	0.06	48M06		55.7632		58.4137		15.8586		0.0813702
34	48M6/052/S/18-19	75.4271	15.5633	52.524	12.576	6.801	0.947	2.817	3.011	0.141	0.101	0.674	0.045	48M06		67.636		70.3982		15.3031		0.0580123
35	48M6/057/S/18-19	75.2593	15.5813	52.11	12.14	6.07	0.9	7.03	3.2	0.15	0.4	0.85	0.12	48M06		45.8109		47.4587		20.6667		0.0757885
36	48M6/058/S/18-19	75.278	15.5813	54.04	11.54	5.7	0.89	7.15	3.12	0.14	0.32	0.88	0.16	48M06		44.3517		46.0371		20.4494		0.0825429
37	48M6/059/S/18-19	75.2966	15.5813	55.03	12.83	6.62	0.95	5.05	3.32	0.12	0.31	1.04	0.15	48M06		54.2546		56.9665		18.3263		0.0877424
38	48M6/060/S/18-19	75.3153	15.5813	56.25	12.85	6.64	0.95	4.19	3.14	0.12	0.27	0.88	0.1	48M06		58.7695		61.4464		17.0421		0.074128
39	48M6/061/S/18-19	75.3339	15.5813	60.98	10.35	7.33	1.06	4.16	2.84	0.13	0.49	0.7	0.07	48M06		53.1379		55.2887		15.7642		0.0732083
40	48M6/062/S/18-19	75.3526	15.5813	56.07	10.01	6.77	0.99	4.91	2.68	0.1	0.3	0.85	0.11	48M06		49.1866		51.5156		16.7677		0.0919153
41	48M6/063/S/18-19	75.3712	15.5813	61.27	10.29	7.1	0.99	3.28	2.6	0.11	0.32	0.91	0.09	48M06		57.9222		61.3223		15.4646		0.0957258
42	48M6/064/S/18-19	75.3899	15.5813	60.87	9.61	6.17	0.91	3.44	2.35	0.11	0.26	0.72	0.06	48M06		56.2918		58.9845		15.3407		0.0810983
43	48M6/065/S/18-19	75.4085	15.5813	55.939	11.579	6.247	0.932	2.973	2.901	0.124	0.05	0.626	0.044	48M06		65.2542		67.845		14.8637		0.0585202
44	48M6/066/S/18-19	75.4271	15.5813	49.59	11.487	5.792	0.815	4.895	2.932	0.128	0.244	0.616	0.039	48M06		53.539		55.2562		18.9227		0.0580466
45	48M6/067/S/18-19	75.4458	15.5813	57.49	9.89	7.34	1.05	4.35	2.69	0.15	0.5	0.69	0.06	48M06		51.0618		53.1097		15.9714		0.0755189
46	48M6/068/S/18-19	75.4644	15.5813	60.68	10.88	6.97	0.97	3.5	2.45	0.11	0.26	0.9	0.12	48M06		58.3512		61.568		15.6289		0.0895399
47	48M6/071/S/18-19	75.2593	15.5994	61.36	9.92	6.72	0.94	3.16	2.38	0.11	0.27	0.69	0.07	48M06		58.8492		61.5776		15.1809		0.0752905
48	48M6/072/S/18-19	75.278	15.5994	54.42	10.98	6.51	0.95	4.61	2.58	0.08	0.26	1.13	0.21	48M06		52.2536		55.4833		16.9684		0.111398
49	48M6/073/S/18-19	75.2966	15.5994	59.76	10.45	7	0.96	4.3	2.73	0.11	0.31	0.96	0.11	48M06		52.7312		55.6492		17.0521		0.0994392
50	48M6/074/S/18-19	75.3153	15.5994	59.56	10.52	7.05	0.96	2.61	2.28	0.11	0.28	1.01	0.11	48M06		62.5466		66.8948		14.8958		0.103922
51	48M6/075/S/18-19	75.3339	15.5994	59.91	9.67	6.02	0.98	4.98	2.42	0.12	0.28	0.79	0.1	48M06		48.2523		50.403		15.9082		0.0884308
52	48M6/076/S/18-19	75.3526	15.5994	61.66	9.68	6.38	0.94	4.17	2.62	0.1	0.37	0.82	0.08	48M06		51.6039		54.1669		16.383		0.0916941
53	48M6/077/S/18-19	75.3712	15.5994	63.38	9.97	6.44	0.95	3.99	2.7	0.1	0.35	0.81	0.08	48M06		53.3804		56.0097		16.1474		0.0879413
54	48M6/078/S/18-19	75.3899	15.5994	58.54	11.056	5.563	0.877	3.085	2.702	0.111	0.185	0.851	0.081	48M06		61.7974		65.1519		15.2497		0.0833171
55	48M6/079/S/18-19	75.4085	15.5994	52.078	10.766	5.923	0.89	5.578	2.868	0.141	0.189	0.633	0.062	48M06		49.1505		50.7376		18.227		0.0636432
56	48M6/080/S/18-19	75.4272	15.5994	51.332	11.787	6.762	0.929	2.951	3.026	0.097	0.225	0.738	0.027	48M06		64.334		67.2669		15.8536		0.0677729
57	48M6/081/S/18-19	75.4458	15.5994	52.343	11.456	6.273	0.898	3.783	2.878	0.122	0.178	0.609	0.038	48M06		59.3995		61.5016		16.4154		0.0575423
58	48M6/085/S/18-19	75.2593	15.6175	61.19	10.22	6.61	0.99	4	2.4	0.12	0.36	0.92	0.1	48M06		53.5612		56.5105		15.5556		0.0974406
59	48M6/086/S/18-19	75.278	15.6175	62.08	10.45	7.19	0.97	3.2	2.38	0.11	0.3	1.01	0.1	48M06		58.5267		62.344		15.6289		0.104618
60	48M6/087/S/18-19	75.2966	15.6175	65.58	10.43	6.77	1.05	4.27	2.5	0.12	0.33	0.96	0.11	48M06		52.7411		55.6662		15.2381		0.0996299
61	48M6/088/S/18-19	75.3153	15.6175	59.18	9.43	5.87	0.94	5.48	2.6	0.11	0.37	0.77	0.1	48M06		45.2581		47.144		17.1702		0.0883857
62	48M6/089/S/18-19	75.3339	15.6175	61.58	9.3	5.93	0.98	5.53	2.65	0.12	0.38	0.77	0.09	48M06		44.6828		46.5467		16.6939		0.0896212
63	48M6/090/S/18-19	75.3526	15.6175	62.99	8.28	5.31	0.85	4.55	2.31	0.11	0.36	0.69	0.06	48M06		46.2776		48.2935		16.6824		0.0902031
64	48M6/091/S/18-19	75.3712	15.6175	55.297	11.423	5.522	0.854	3.823	3.13	0.099	0.236	0.791	0.06	48M06		58.2256		60.8827		16.9262		0.0749547
65	48M6/092/S/18-19	75.3899	15.6175	56.998	11.201	5.291	0.9	3.99	2.794	0.12	0.178	0.781	0.061	48M06		57.1657		59.7433		15.6156		0.0754739
66	48M6/093/S/18-19	75.4085	15.6175	54.562	11.002	5.709	0.799	4.376	2.827	0.136	0.117	0.651	0.062	48M06		55.4098		57.4486		18.2916		0.064049
67	48M6/094/S/18-19	75.4272	15.6175	57.258	10.977	5.339	0.818	4.053	2.964	0.117	0.393	0.655	0.033	48M06		55.7158		57.7956		17.5293		0.0645893
68	48M6/095/S/18-19	75.4458	15.6175	54.178	11.617	5.953	0.873	4.526	2.933	0.127	0.112	0.63	0.054	48M06		56.087		57.9965		17.3585		0.0587015
69	48M6/096/S/18-19	75.4645	15.6175	55.332	12.008	6.148	0.898	4.441	2.742	0.145	0.118	0.642	0.057	48M06		57.2579		59.2202		16.853		0.0578718
70	48M6/097/S/18-19	75.4831	15.6175	54.652	12.246	6.229	0.86	4.239	2.857	0.141	0.149	0.654	0.033	48M06		58.5751		60.6281		17.5919		0.0578078
71	48M6/099/S/18-19	75.2593	15.6356	59.15	12.066	5.61	0.997	4.764	3.436	0.119	0.258	0.929	0.114	48M06		54.4543		57.043		16.1615		0.0833403
72	48M6/100/S/18-19	75.278	15.6356	58.156	11.535	5.704	0.831	6.647	3.305	0.135	0.292	0.802	0.127	48M06		46.1969		47.8609		21.3189		0.0752592
73	48M6/101/S/18-19	75.2966	15.6356	60.227	11.293	5.578	0.86	5.915	3.328	0.139	0.412	0.737	0.107	48M06		48.0077		49.6929		19.7314		0.0706417
74	48M6/102/S/18-19	75.3153	15.6356	61.248	11.541	5.775	0.908	5.076	3.39	0.11	0.437	0.92	0.111	48M06		51.3274		53.706		18.2996		0.0862874
75	48M6/103/S/18-19	75.3339	15.6356	60.101	11.47	5.006	0.862	5.923	3.406	0.135	0.289	0.741	0.086	48M06		48.7735		50.4958		18.9814		0.069929
76	48M6/104/S/18-19	75.3526	15.6356	59.27	11.395	5.256	0.823	5.151	3.198	0.122	0.269	0.816	0.067	48M06		51.5927		53.7419		18.9976		0.0775137
77	48M6/105/S/18-19	75.3713	15.6356	54.144	11.2311	5.354	0.821	5.062	3.153	0.132	0.169	0.646	0.051	48M06		52.4518		54.2225		18.6809		0.0622606
78	48M6/106/S/18-19	75.3899	15.6356	54.444	11.962	6.317	0.881	2.898	3.045	0.101	0.204	0.941	0.061	48M06		64.3624		68.0943		16.3303		0.0851508
79	48M6/107/S/18-19	75.4086	15.6356	53.441	11.424	5.809	0.862	4.138	2.935	0.12	0.226	0.653	0.071	48M06		57.0446		59.1317		17.1032		0.0618725
80	48M6/108/S/18-19	75.4272	15.6356	55.238	11.716	5.827	0.905	3.661	3.105	0.119	0.312	0.673	0.048	48M06		59.732		62.0361		16.1348		0.0621783
81	48M6/109/S/18-19	75.4458	15.6356	55.968	12.256	6.326	0.929	3.224	3.022	0.13	0.157	0.666	0.047	48M06		64.1772		66.6948		15.5587		0.0588204
82	48M6/110/S/18-19	75.4645	15.6356	52.534	10.758	5.36	0.775	6.031	2.776	0.137	0.14	0.481	0.045	48M06		47.8672		49.0024		20.2581		0.0483968
83	48M6/111/S/18-19	75.4832	15.6356	56.3	10.74	5.618	0.832	4.444	2.819	0.135	0.235	0.538	0.036	48M06		54.2722		55.9177		17.5733		0.0542227
84	48M6/114/S/18-19	75.278	15.6536	59.519	12.168	6.271	0.92	5.341	3.435	0.148	0.317	0.877	0.099	48M06		52.1115		54.3199		18.8141		0.0780159
85	48M6/115/S/18-19	75.2966	15.6536	59.584	12.537	6.535	0.951	4.75	3.618	0.138	0.327	0.878	0.089	48M06		55.322		57.7436		18.0831		0.075806
86	48M6/116/S/18-19	75.3153	15.6536	58.407	12.049	6.134	0.908	4.899	3.463	0.124	0.239	0.886	0.081	48M06		54.0103		56.4365		18.3403		0.079595
87	48M6/117/S/18-19	75.334	15.6536	57.394	12.467	6.277	0.945	5.138	3.672	0.134	0.382	0.902	0.092	48M06		53.2463		55.5633		18.4656		0.0783154
88	48M6/119/S/18-19	75.3713	15.6536	58.552	11.663	6.06	0.971	5.497	3.302	0.16	0.345	0.761	0.089	48M06		50.6007		52.4761		17.6066		0.070628
89	48M6/120/S/18-19	75.3899	15.6536	58.645	10.66	5.343	0.848	4.097	2.908	0.099	0.184	0.753	0.074	48M06		55.4428		57.8971		16.783		0.0764611
90	48M6/121/S/18-19	75.4086	15.6536	58.134	11.203	5.6	0.858	3.894	3.078	0.108	0.265	0.851	0.069	48M06		57.041		59.8479		17.0793		0.0822239
91	48M6/122/S/18-19	75.4272	15.6536	51.33	8.007	5.868	0.821	3.07	3.072	0.111	0.097	0.611	0.039	48M06		55.566		58.239		16.6261		0.0825989
92	48M6/123/S/18-19	75.4459	15.6536	50.849	8.977	6.213	0.811	3.785	3.183	0.138	0.107	0.648	0.036	48M06		53.6375		55.9838		18.3539		0.0781352
93	48M6/124/S/18-19	75.4645	15.6536	50.419	8.674	5.4	0.74	5.697	3.059	0.141	0.188	0.48	0.04	48M06		43.6729		44.8461		21.223		0.0598997
94	48M6/125/S/18-19	75.4832	15.6536	55.587	11.103	5.825	0.85	4.728	3.034	0.138	0.278	0.699	0.066	48M06		53.09		55.0829		18.2965		0.0681459
95	48M6/126/S/18-19	75.5	15.6536	51.839	9.293	5.109	0.696	4.233	3.265	0.133	0.17	0.501	0.029	48M06		52.1741		53.8125		20.2687		0.0583559
96	48M6/128/S/18-19	75.278	15.6717	58.45	13.18	5.804	0.915	5.424	3.616	0.128	0.477	0.874	0.092	48M06		53.2035		55.316		18.8393		0.0717792
97	48M6/129/S/18-19	75.2966	15.6717	58.146	12.803	6.452	0.986	4.55	3.541	0.123	0.231	0.848	0.073	48M06		57.2231		59.6711		16.9686		0.0716947
98	48M6/130/S/18-19	75.3153	15.6717	56.066	11.496	5.47	0.886	5.262	3.173	0.127	0.292	0.675	0.069	48M06		51.6106		53.3609		17.9289		0.0635565
99	48M6/131/S/18-19	75.334	15.6717	55.598	11.821	5.799	0.865	5.344	3.369	0.129	0.226	0.725	0.073	48M06		52.0883		53.9541		19.0254		0.0663875
100	48M6/137/S/18-19	75.4459	15.6717	57.74	11.089	5.732	0.873	3.794	2.827	0.119	0.243	0.743	0.095	48M06		57.7812		60.3086		16.4158		0.0725269
101	48M6/138/S/18-19	75.4646	15.6717	58.986	11.046	5.619	0.859	4.81	3	0.131	0.264	0.625	0.074	48M06		52.8454		54.613		17.8207		0.061246
102	48M6/139/S/18-19	75.4832	15.6717	58.735	11.21	5.556	0.825	4.279	2.97	0.128	0.23	0.627	0.052	48M06		55.9179		57.8773		17.7152		0.0605431
103	48M6/143/S/18-19	75.2966	15.6898	56.322	11.511	5.475	0.875	4.907	3.239	0.115	0.272	0.756	0.058	48M06		53.049		55.128		17.8731		0.0710905
104	48M6/153/S/18-19	75.4832	15.6898	58.917	11.359	5.595	0.904	3.17	2.703	0.116	0.21	0.767	0.056	48M06		62.0762		65.0266		14.8949		0.07309
105	48M07/183/S/2017	75.2593	15.494	53.76	8.81	4.35	0.75	7.67	2.8	0.12	0.27	0.54	0.11	48M07		37.041		37.9742		22		0.0663469
106	48M07/184/S/2017	75.278	15.494	56.6	9.4	4.62	0.76	5.48	2.89	0.09	0.28	0.75	0.11	48M07		45.5508		47.4161		19.5658		0.0863647
107	48M07/185/S/2017	75.2966	15.494	55.48	10.58	5.55	0.83	4.38	3.05	0.07	0.17	0.89	0.1	48M07		53.4698		56.2064		18		0.0910557
108	48M07/186/S/2017	75.3152	15.494	53.18	10.51	5.78	0.84	6.25	3.19	0.11	0.23	1.01	0.1	48M07		45.0193		47.2311		20.7262		0.104021
109	48M07/187/S/2017	75.3339	15.494	53.27	7.63	3.09	0.57	9.94	2.24	0.08	0.26	0.52	0.15	48M07		28.5835		29.1992		29.2982		0.0737703
110	48M07/188/S/2017	75.3525	15.494	58.77	7.92	3.5	0.67	5.88	2.27	0.11	0.4	0.45	0.07	48M07		40.0885		41.1019		19.8209		0.0615021
111	48M07/189/S/2017	75.3712	15.494	55.48	10.44	5.74	0.86	4.18	2.86	0.1	0.17	0.74	0.08	48M07		54.6001		56.9874		17.0349		0.0767245
112	48M02/013/S/16	75.233	15.509	60.993	9.989	5.149	0.839	7.787	3.073	0.174	0.383	0.773	0.084	48M02		38.9977		40.3147		21.6663		0.0837646
113	48M02/014/S/16	75.25	15.509	60.772	10.017	5.136	0.853	7.841	3.134	0.171	0.449	0.821	0.168	48M02		38.6741		40.0482		21.5768		0.0887173
114	48M02/025/S/16	75.1958	15.5271	55.77	10.01	5.363	0.906	9.326	2.959	0.251	0.545	0.701	0.084	48M02		34.9729		35.9253		22.1313		0.0758031
115	48M02/027/S/16	75.233	15.5271	57.335	10.623	6.075	1.285	8.049	2.954	0.204	0.475	0.82	0.109	48M02		39.4512		40.796		15.4568		0.0835544
116	48M02/028/S/16	75.25	15.5271	59.12	10.68	5.367	0.889	6.926	3.154	0.158	0.489	0.757	0.094	48M02		42.8969		44.3568		19.955		0.0767233
117	48M02/035/S/16	75.1212	15.5452	57.241	10.077	5.038	0.874	9.772	3.203	0.185	0.288	0.806	0.08	48M02		34.521		35.5845		23.0732		0.0865778
118	48M02/036/S/16	75.1398	15.5452	58.113	9.847	5.046	0.901	8.653	2.96	0.187	0.422	0.811	0.078	48M02		36.266		37.4777		21.0655		0.0891497
119	48M02/037/S/16	75.1585	15.5452	63.598	9.042	4.416	1.116	8.104	2.665	0.174	0.467	0.647	0.089	48M02		35.8163		36.8382		15.7608		0.0774538
120	48M02/038/S/16	75.1771	15.5452	60.102	8.604	4.024	0.787	9.334	2.683	0.152	0.374	0.598	0.083	48M02		32.0592		32.8515		22.8107		0.0752322
121	48M02/039/S/16	75.1958	15.5452	55.431	10.538	5.781	0.951	9.232	3.195	0.207	0.345	0.694	0.084	48M02		36.7913		37.7823		21.4564		0.071286
122	48M02/040/S/16	75.2144	15.5452	54.804	10.676	6.085	0.915	8.918	3.05	0.216	0.277	0.756	0.103	48M02		37.9053		39.0396		22.0951		0.0766507
123	48M02/041/S/16	75.2331	15.5452	57.827	10.458	5.633	0.795	7.524	3.018	0.154	0.23	0.796	0.093	48M02		41.2084		42.6567		22.8302		0.0823886
124	48M02/042/S/16	75.25	15.5452	56.417	11.228	6.208	0.788	7.204	3.309	0.129	0.272	0.973	0.215	48M02		43.4736		45.3218		23.9632		0.0938022
125	48M02/049/S/16	75.1212	15.5633	61.325	9.829	4.974	0.991	7.916	3.121	0.161	0.392	0.811	0.095	48M02		38.1786		39.5264		18.5328		0.0893129
126	48M02/050/S/16	75.1398	15.5633	63.196	9.899	4.545	0.891	5.93	2.905	0.134	0.392	0.834	0.112	48M02		44.5325		46.4176		17.5432		0.0911964
127	48M02/051/S/16	75.1585	15.5633	62.465	9.481	4.464	0.819	7.304	2.781	0.143	0.412	0.694	0.112	48M02		39.1934		40.4495		20.2894		0.0792334
128	48M02/052/S/16	75.1771	15.5633	58.227	9.766	4.975	1.009	8.388	3.055	0.174	0.447	0.75	0.112	48M02		36.7634		37.9224		18.6303		0.083128
129	48M02/053/S/16	75.1958	15.5633	56.297	10.775	5.791	1.036	9.193	3.29	0.174	0.261	0.789	0.099	48M02		37.4479		38.5934		19.8205		0.0792615
130	48M02/054/S/16	75.2144	15.5633	57.503	11.452	6.61	0.993	7.002	3.405	0.171	0.231	0.862	0.092	48M02		44.9164		46.6225		19.4099		0.0814758
131	48M02/055/S/16	75.2331	15.5633	55.428	11.295	6.431	0.953	7.678	3.362	0.173	0.39	0.985	0.11	48M02		41.8906		43.6152		20.957		0.0943958
132	48M02/056/S/16	75.25	15.5633	57.449	11.329	6.25	0.97	6.337	3.331	0.159	0.468	0.966	0.119	48M02		45.9285		47.9616		19.0526		0.0922972
133	48M02/062/S/17	75.1026	15.5813	63.346	10.926	5.511	0.901	6.18	3.306	0.141	0.321	0.88	0.09	48M02		46.2119		48.1519		19.1343		0.0871815
134	48M02/063/S/17	75.1212	15.5813	58.589	11.692	6.096	0.854	6.225	3.336	0.123	0.199	1.049	0.124	48M02		47.7745		50.0989		20.9391		0.0971157
135	48M02/064/S/17	75.1399	15.5813	65.159	10.142	5.168	0.907	5.654	2.764	0.122	0.286	0.975	0.103	48M02		46.209		48.5432		17.5039		0.10406
136	48M02/065/S/17	75.1585	15.5813	58.411	11.504	5.879	0.825	6.041	3.257	0.117	0.25	0.984	0.149	48M02		48.0048		50.2376		21.0339		0.0925868
137	48M02/066/S/17	75.1771	15.5813	66.929	10.076	5.061	0.99	5.337	2.715	0.117	0.373	0.868	0.119	48M02		47.2319		49.4079		15.6172		0.0932469
138	48M02/067/S/17	75.1958	15.5813	57.873	12.246	6.569	0.914	5.738	3.589	0.121	0.211	0.971	0.122	48M02		50.8615		53.1832		19.8173		0.0858278
139	48M02/068/S/17	75.2144	15.5813	58.347	11.704	6.391	0.898	6.129	3.243	0.149	0.303	0.834	0.096	48M02		48.2657		50.132		19.9855		0.077132
140	48M02/069/S/17	75.2331	15.5813	60.136	11.067	5.685	0.876	6.759	3.293	0.154	0.291	0.839	0.122	48M02		44.7273		46.4315		20.4304		0.0820606
141	48M02/070/S/17	75.25	15.5813	59.891	11.211	5.469	0.834	6.66	3.423	0.138	0.352	0.825	0.121	48M02		45.2194		46.909		21.2242		0.0796549
142	48M02/076/S/17	75.1026	15.5994	60.926	11.276	5.777	0.902	6.721	3.061	0.135	0.191	0.941	0.126	48M02		45.4145		47.3573		19.6541		0.0903311
143	48M02/077/S/17	75.1212	15.5994	63.298	10.609	4.981	0.869	6.06	2.852	0.123	0.285	0.75	0.138	48M02		46.3111		48.0126		18.3199		0.0765226
144	48M02/078/S/17	75.1399	15.5994	64.367	10.068	4.778	0.926	6.464	2.999	0.138	0.378	0.725	0.124	48M02		43.345		44.8606		17.7192		0.0779467
145	48M02/079/S/17	75.1585	15.5994	58.861	11.994	6.158	0.911	4.851	3.324	0.112	0.233	0.917	0.131	48M02		54.0511		56.5821		18.1186		0.0827576
146	48M02/080/S/17	75.1772	15.5994	60.482	11.224	5.784	0.939	5.513	3.101	0.127	0.155	0.918	0.105	48M02		49.8921		52.1977		17.6113		0.0885315
147	48M02/081/S/17	75.1958	15.5994	59.226	12.215	6.844	0.968	4.205	3.043	0.11	0.101	1.045	0.1	48M02		57.7325		60.9933		16.8554		0.0926031
148	48M02/082/S/17	75.2145	15.5994	58.804	13.006	6.809	0.986	4.146	3.498	0.095	0.05	1.092	0.121	48M02		59.6369		63.0545		16.9128		0.0908828
149	48M02/083/S/17	75.2331	15.5994	58.367	12.851	7.011	0.939	4.481	3.418	0.102	0.144	1.051	0.088	48M02		57.4398		60.517		18.2599		0.0885255
150	48M02/084/S/17	75.25	15.5994	58.228	12.97	7.152	0.952	4.354	3.484	0.101	0.113	1.13	0.099	48M02		58.1729		61.5496		18.1576		0.0943064
151	48M02/090/S/17	75.1026	15.6175	58.377	11.09	4.783	0.739	9.201	2.737	0.155	0.498	0.933	0.147	48M02		37.4047		38.7238		25.7727		0.0910653
152	48M02/091/S/17	75.1212	15.6175	62.739	10.256	5.032	0.937	7.599	3.047	0.164	0.328	0.666	0.145	48M02		40.4845		41.6703		18.968		0.0702909
153	48M02/092/S/17	75.1399	15.6175	62.278	10.331	4.868	0.908	7.687	3.171	0.169	0.342	0.66	0.106	48M02		40.3796		41.5395		19.609		0.0691519
154	48M02/093/S/17	75.1585	15.6175	60.058	10.658	5.225	0.854	8.005	3.268	0.162	0.35	0.725	0.109	48M02		40.1077		41.3282		21.767		0.0736317
155	48M02/094/S/17	75.1772	15.6175	62.295	9.947	4.583	0.834	7.12	2.955	0.12	0.237	0.734	0.135	48M02		41.313		42.7228		19.8837		0.0798742
156	48M02/095/S/17	75.1958	15.6175	62.098	12.225	6.503	0.965	4.78	3.213	0.118	0.279	1.013	0.104	48M02		54.402		57.1927		17.4829		0.089694
157	48M02/096/S/17	75.2145	15.6175	61.924	11.594	6	0.942	4.865	3.125	0.104	0.201	0.948	0.155	48M02		53.1921		55.82		17.1815		0.088507
158	48M02/097/S/17	75.2331	15.6175	62.586	12.567	6.761	1.002	3.671	3.059	0.107	0.21	1.086	0.095	48M02		60.5268		64.1593		15.8643		0.0935408
159	48M02/098/S/17	75.25	15.6175	63.396	11.509	5.906	0.936	4.158	2.866	0.112	0.168	1.068	0.16	48M02		56.1371		59.4917		16.2543		0.100447
160	48M02/104/S/17	75.1026	15.6356	59.666	10.867	5.338	0.902	7.799	3.158	0.194	0.295	0.653	0.089	48M02		41.4147		42.5612		20.3315		0.0650439
161	48M02/105/S/17	75.1213	15.6356	62.366	9.601	4.448	0.986	7.932	2.931	0.176	0.414	0.604	0.089	48M02		37.8618		38.8638		17.7394		0.0680963
162	48M02/106/S/17	75.1399	15.6356	61.061	10.555	5.274	0.976	7.579	3.145	0.172	0.516	0.663	0.094	48M02		40.75		41.9112		18.7756		0.067992
163	48M02/107/S/17	75.1586	15.6356	60.374	10.559	5.331	0.965	7.118	3.225	0.163	0.412	0.821	0.101	48M02		42.1221		43.6703		18.6891		0.0841634
164	48M02/108/S/17	75.1772	15.6356	61.06	9.893	4.695	0.969	7.53	3.062	0.149	0.362	0.703	0.11	48M02		39.6661		40.9144		18.0289		0.0769184
165	48M02/109/S/17	75.1958	15.6356	60.036	10.823	5.252	0.89	6.906	3.367	0.132	0.269	0.752	0.127	48M02		43.9313		45.4324		19.7393		0.0752096
166	48M02/110/S/17	75.2145	15.6356	59.147	11.584	5.925	0.938	5.81	3.526	0.122	0.268	0.899	0.121	48M02		49.1642		51.2821		18.6439		0.0840048
167	48M02/111/S/17	75.2332	15.6356	59.934	11.288	5.864	0.965	5.386	3.34	0.12	0.278	0.917	0.099	48M02		50.1001		52.409		17.4819		0.0879337
168	48M02/112/S/17	75.25	15.6356	61.231	12.281	6.427	1.008	4.115	3.551	0.089	0.324	1.002	0.103	48M02		57.4399		60.5095		16.3849		0.0883155
169	48M02/118/S/17	75.1026	15.6536	57.904	9.293	4.942	0.844	7.57	2.557	0.17	0.201	0.625	0.075	48M02		38.6176		39.7347		20.0344		0.0727992
170	48M02/119/S/17	75.1213	15.6536	59.458	10.55	4.94	0.866	6.942	2.604	0.147	0.151	0.565	0.069	48M02		43.8996		45.046		18.724		0.0579694
171	48M02/120/S/17	75.1399	15.6536	61.641	9.47	4.71	0.997	7.183	2.428	0.148	0.224	0.575	0.071	48M02		40.2615		41.3559		16.3139		0.0657235
172	48M02/121/S/17	75.1586	15.6536	62.158	8.68	4.488	1.071	6.537	2.449	0.141	0.17	0.559	0.064	48M02		40.4653		41.6399		14.3931		0.06971
173	48M02/122/S/17	75.1772	15.6536	59.98	9.21	5.58	1.003	5.626	2.614	0.127	0.132	0.594	0.088	48M02		45.3707		46.8548		15.6291		0.0698119
174	48M02/124/S/17	75.2145	15.6536	57.686	10.19	5.196	0.996	5.781	2.795	0.124	0.111	1.128	0.157	48M02		46.0987		48.7939		16.1958		0.119822
175	48M02/125/S/17	75.2332	15.6536	58.341	10.21	5.361	1.001	5.731	2.872	0.13	0.176	0.711	0.076	48M02		47.0737		48.8055		15.966		0.0753784
176	48M02/138/S/17	75.2146	15.6717	59.549	10.33	5.61	0.88	5.34	2.829	0.102	0.207	0.693	0.088	48M02		48.8879		50.6873		17.7966		0.0726166
177	48M02/139/S/17	75.2332	15.6717	63.334	10.227	4.441	0.795	4.643	2.674	0.09	0.145	0.676	0.097	48M02		52.0742		54.0895		16.9358		0.0715486
178	48M10/087/S/18	75.5466	15.6175	61.084	12.714	7.356	1.039	3.649	3.284	0.149	0.231	0.676	0.06	48M10		62.1394		64.4441		15.769		0.0575529
179	48M10/099/S/18	75.5093	15.6356	58.03	13.212	8.265	1.013	4.898	3.564	0.17	0.338	0.602	0.064	48M10		56.6423		58.2701		18.6081		0.0493209
180	48M10/100/S/18	75.528	15.6356	60.013	12.914	8.071	1.056	4.614	3.589	0.152	0.517	0.654	0.064	48M10		56.4875		58.2925		17.6638		0.0548176
181	48M10/101/S/18	75.5466	15.6356	64.422	11.585	6.708	0.974	3.952	2.972	0.139	0.274	0.591	0.049	48M10		58.3301		60.2714		16.0267		0.0552197
